# Supplementary material for: A Simple Method for Estimating Informative Node Age Priors for the Fossil Calibration of Molecular Divergence Time Analyses
Source: PubMed Central journal article supplement (PMC3673923; doi:10.1371/journal.pone.0066245), 2013-06-05

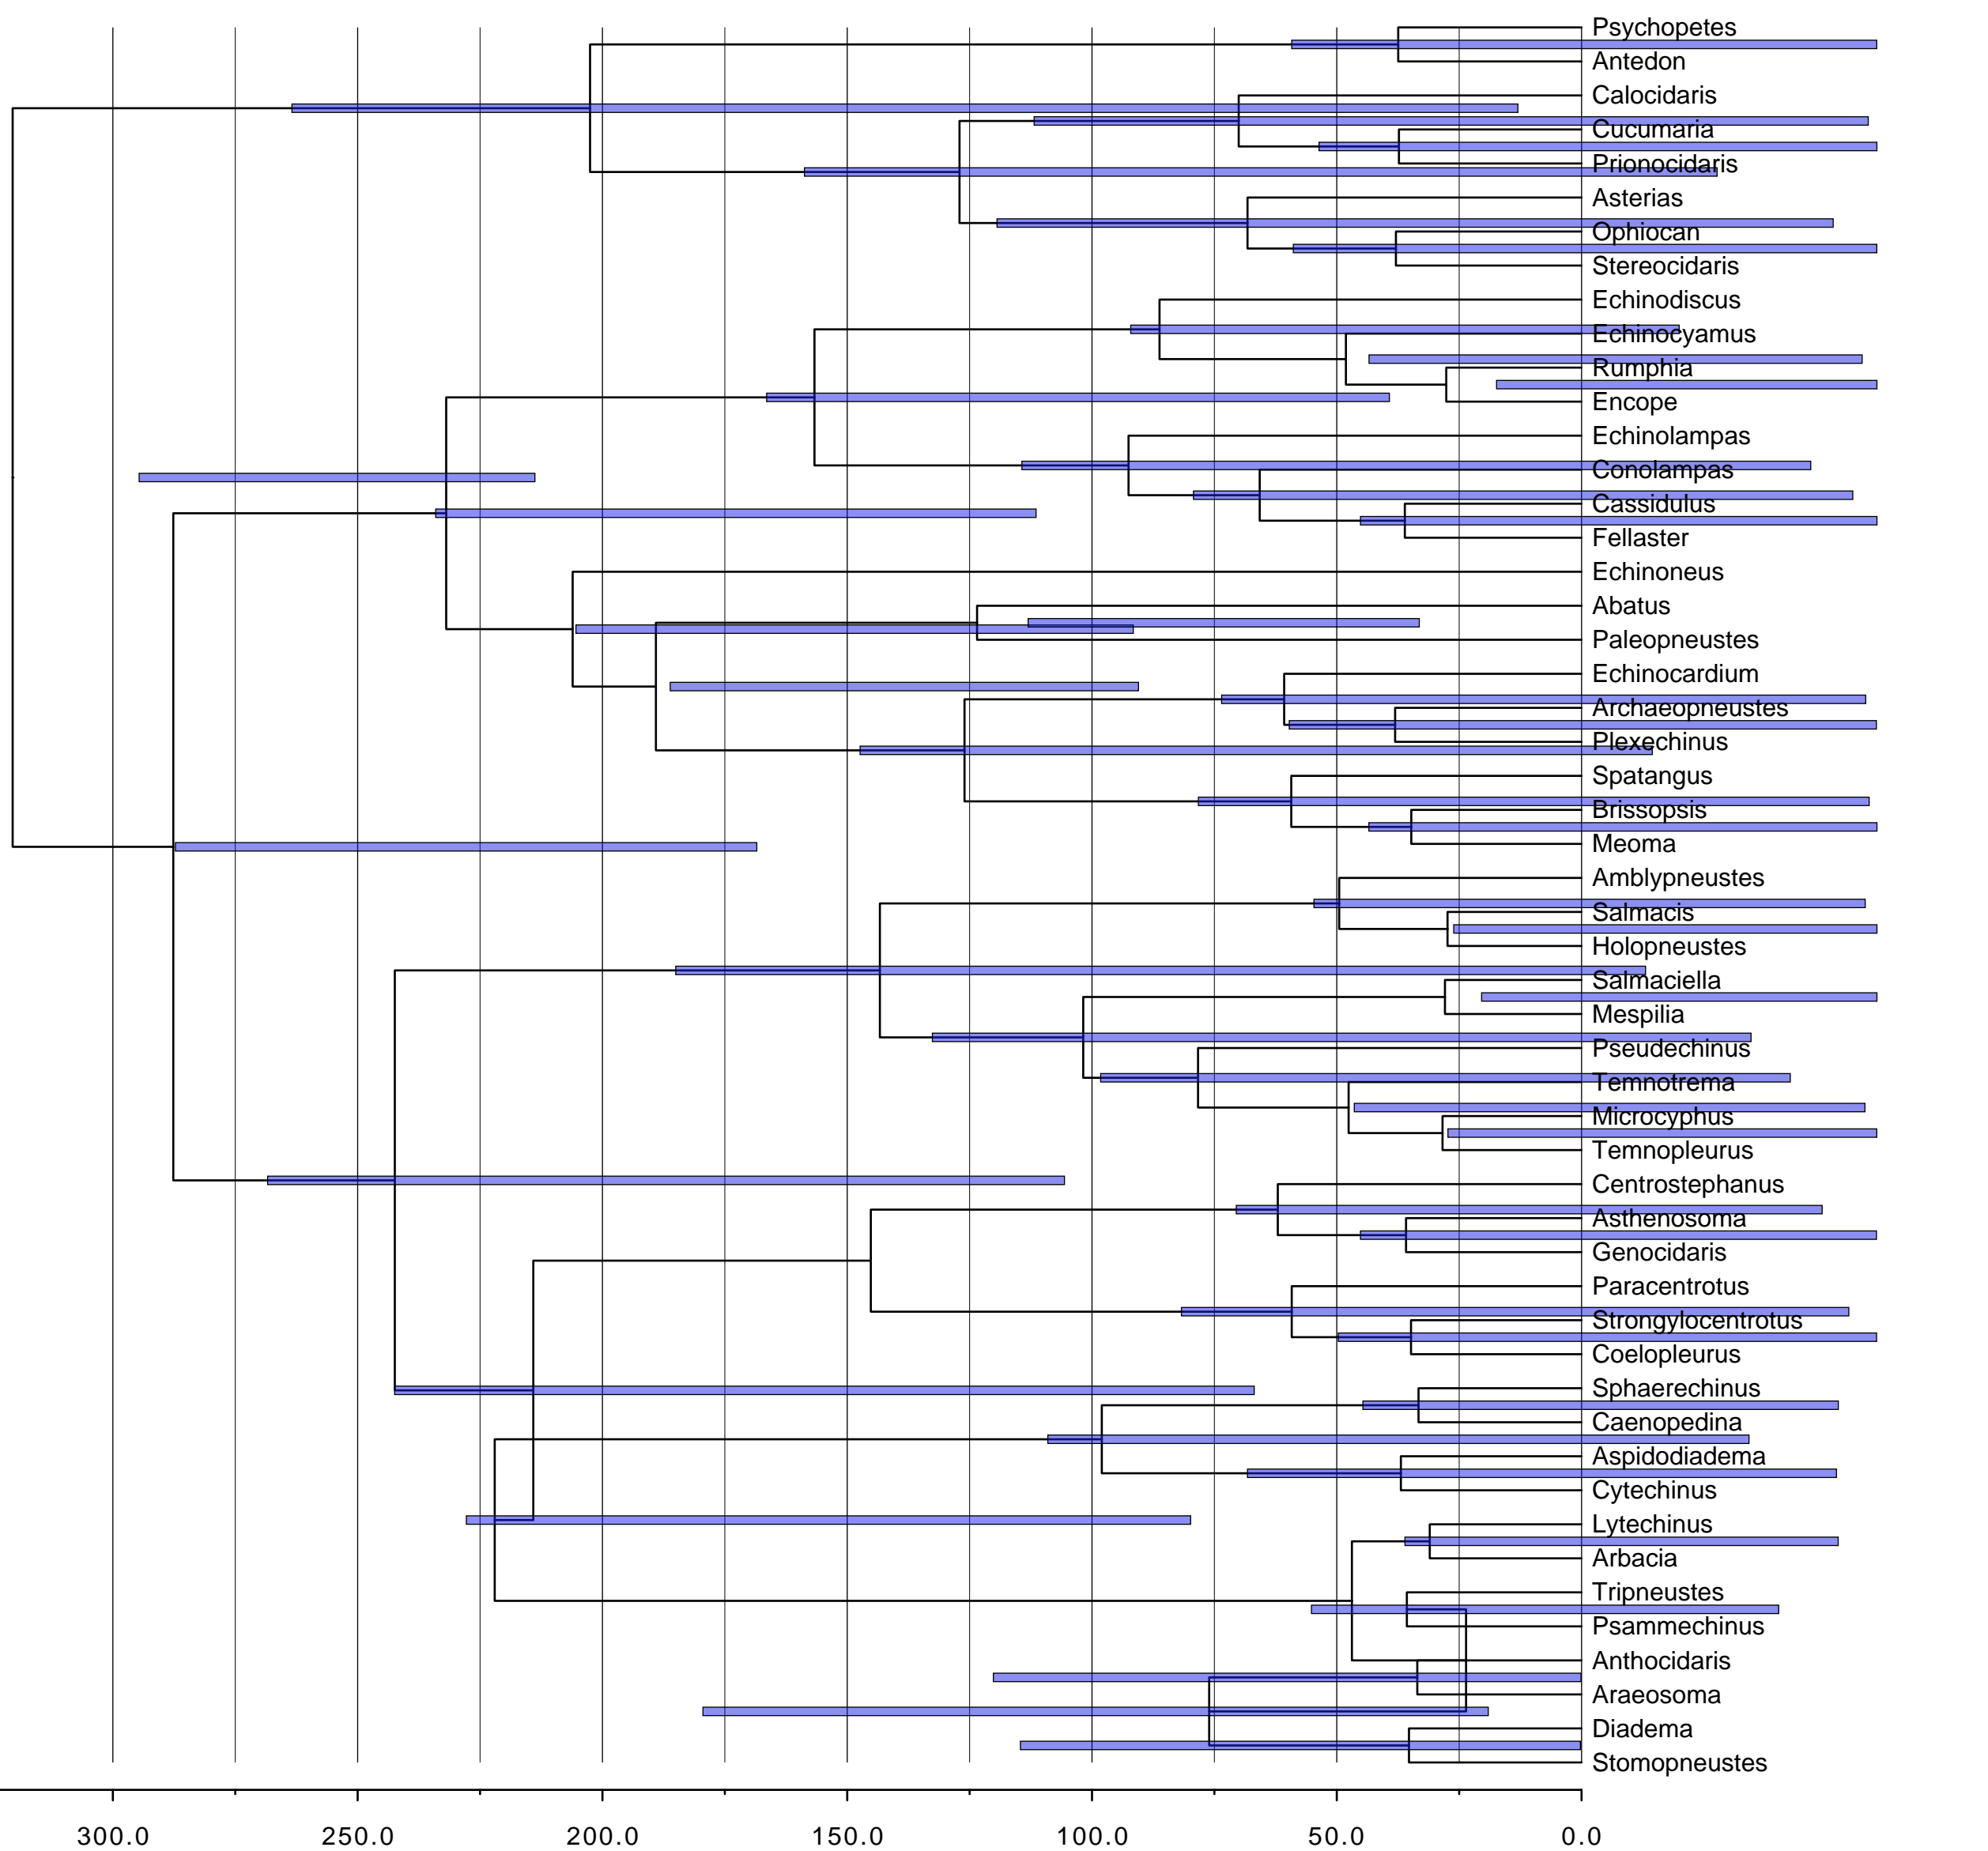

Supplement: pone.0066245.s002.pdf [file pone.0066245.s002.pdf]
